# Supplementary material
Source: publisher site journal article supplement (https://www.dovepress.com/get_supplementary_file.php?f=245486.docx)
Supplement: Supplementary file 1 [file get_supplementary_file.php]

**Supplemental Table 1.** **Demographics and baseline characteristics, HRQoL outcomes, and weight loss behaviors by body weight category and T2DM status**

|  | People with T2DM | | | | | | People without T2DM | | | | | |
| --- | --- | --- | --- | --- | --- | --- | --- | --- | --- | --- | --- | --- |
|  | Normal weight  (BMI ≥18.5–<25 kg/m2) | Overweight (BMI ≥25–<30 kg/m2) | Class 1 obesity  (BMI ≥30–<35 kg/m2) | Class 2 obesity  (BMI ≥35–<40 kg/m2) | Class 3 obesity (BMI ≥40 kg/m2) | Combined class 2 and 3 obesity (BMI ≥35 kg/m2) | Normal weight  (BMI ≥18.5–<25 kg/m2) | Overweight (BMI ≥25–<30 kg/m2) | Class 1 obesity  (BMI ≥30–<35 kg/m2) | Class 2 obesity  (BMI ≥35–<40 kg/m2) | Class 3 obesity (BMI ≥40 kg/m2) | Combined class 2 and 3 obesity (BMI ≥35 kg/m2) |
| Total population, n | 715 | 1,781 | 1,737 | 1,093 | 1,147 | 2,240 | 23,723 | 20,232 | 10,075 | 4,505 | 3,313 | 7,818 |
| Total weighted population (represented in thousands) | 2,398 | 6,482 | 6,109 | 3,889 | 3,927 | 7,816 | 74,745 | 66,182 | 34,181 | 15,781 | 11,482 | 27,263 |
| Mean age, years | 63.4c,d,e,f | 63.4c,d,e,f | 61.7d,e,f | 60.2e | 56.6 | 58.4 | 43.5 | 49.2g,j,k,l | 49.2g,j,k,l | 46.3g,k | 43.8 | 45.2g |
| Sex, % |  |  |  |  |  |  |  |  |  |  |  |  |
| Female | 50.2b,c | 36.8 | 42.7b | 46.2b | 57.1a,b,c,d | 51.7b,c | 57.0h,i,j | 44.2 | 48.8h | 55.0h,i | 60.5g,h,i,j | 57.3h,i |
| Male | 49.8e | 63.2a,c,d,e,f | 57.3a,e,f | 53.8e | 42.9 | 48.3 | 43.0k | 55.8g,i,j,k,l | 51.2g,j,k,l | 45.0g,k | 39.5 | 42.7 |
| Race/ethnicity, % |  |  |  |  |  |  |  |  |  |  |  |  |
| White | 61.6 | 62.9 | 66.3 | 65.8 | 67.3a,b | 66.6b | 62.1 | 65.3g,j,k,l | 64.8g,j,l | 62.5 | 63.2 | 62.8 |
| Hispanic | 9.1 | 18.1a,c,d,e,f | 14.1a | 13.7a | 12.9a | 13.3a | 15.8 | 15.4 | 16.0 | 17.8g,h,i,k | 15.5 | 16.8h |
| African American | 12.4 | 11.6 | 14.6b | 15.1b | 13.9 | 14.5b | 10.8 | 11.2 | 12.9g,h | 14.3g,h,i | 16.1g,h,i | 15.1g,h,i |
| American Indian | 1.1 | 1.0 | 0.6 | 0.6 | 0.4 | 0.5 | 0.4 | 0.5g | 0.7g | 0.6g | 0.6 | 0.6g |
| Asian | 10.0b,c,d,e,f | 3.5c,d,e,f | 1.7e,f | 1.1 | 0.5 | 0.8 | 8.0h,i,j,k,l | 4.7i,j,k,l | 2.5j,k,l | 1.5k | 0.8 | 1.2 |
| Mixed | 4.0b,c | 1.8 | 2.0 | 3.0 | 4.3b,c | 3.6b,c | 1.9 | 1.7 | 1.9 | 2.4h | 2.6g,h,i | 2.5g,h,i |
| Other | 1.8c,f | 1.1 | 0.6 | 0.8 | 0.6 | 0.7 | 0.9 | 1.1g | 1.1 | 0.9 | 1.1 | 1.0 |
| Mean CCI score | 1.96b,c,d,f | 1.59 | 1.75b | 1.75b | 1.82b | 1.79b | 0.26 | 0.28g | 0.33g,h | 0.36g,h | 0.37g,h | 0.37g,h,i |
| CCI score, % |  |  |  |  |  |  |  |  |  |  |  |  |
| 0 | 0.0 | 0.0 | 0.0 | 0.0 | 0.0 | 0.0 | 86.1h,i,j,k,l | 83.1i,j,k,l | 80.4k | 80.2 | 78.2 | 79.3 |
| 1 | 60.8 | 67.2a,c,d,e,f | 61.5e,f | 58.3 | 56.9 | 57.6 | 7.9 | 10.3g | 12.0g,h | 11.2g | 13.4g,h,j | 12.2g,h |
| 2 | 15.9 | 18.9 | 19.2 | 23.1a,b,c | 22.1a | 22.6a,b,c | 3.8 | 4.2 | 4.8g,h | 5.3g,h | 5.0g | 5.1g,h |
| 3 | 11.8b | 8.1 | 11.0b | 10.9b | 10.8b | 10.9b | 0.9 | 1.2g | 1.4g | 1.6g | 2.2g,h,i | 1.8g,h |
| ≥4 | 11.4b,c,d | 5.8 | 8.2b | 7.7 | 10.2b | 9.0b | 1.3 | 1.1 | 1.4 | 1.8g,h | 1.2 | 1.5h |
| SF-36v2 scores |  |  |  |  |  |  |  |  |  |  |  |  |
| PCS | 46.3c,d,e,f | 46.6c,d,e,f | 43.8d,e,f | 41.5e | 38.2 | 39.8 | 52.7h,i,j,k,l | 51.4i,j,k,l | 49.3j,k,l | 47.9k | 44.9 | 46.6 |
| MCS | 49.2d,e,f | 50.3c,d,e,f | 49.2d,e,f | 47.5e | 44.4 | 45.9 | 46.9j,k,l | 48.4g,i,j,k,l | 47.3g,j,k,l | 45.4k | 43.0 | 44.4 |
| Physical functioning | 46.7c,d,e,f | 47.4c,d,e,f | 44.8d,e,f | 41.9e | 37.9 | 39.9 | 51.8h,i,j,k,l | 51.2i,j,k,l | 49.2j,k,l | 47.7k | 44.2 | 46.2 |
| Bodily pain | 47.2c,d,e,f | 47.5c,d,e,f | 45.1d,e,f | 43.7e | 40.3 | 42.0 | 51.2h,i,j,k,l | 50.3i,j,k,l | 48.4j,k,l | 47.2k | 44.7 | 46.1 |
| Social functioning | 47.3d,e,f | 48.9a,c,d,e,f | 46.9d,e,f | 45.3e | 41.8 | 43.6 | 48.2i,j,k,l | 49.1g,i,j,k,l | 47.9j,k,l | 45.9k | 43.2 | 44.8 |
| Mental health | 49.5d,e,f | 50.6c,d,e,f | 49.5d,e,f | 47.8e | 44.7 | 46.2 | 47.6j,k,l | 48.9g,i,j,k,l | 47.7j,k,l | 46.1k | 43.4 | 45.0 |
| Vitality | 50.5c,d,e,f | 49.8c,d,e,f | 47.7d,e,f | 45.0e | 42.0 | 43.5 | 50.7i,j,k,l | 50.7i,j,k,l | 48.5j,k,l | 46.7k | 43.7 | 45.4 |
| General health | 46.2c,d,e,f | 46.4c,d,e,f | 43.8d,e,f | 41.6e | 38.6 | 40.1 | 52.0h,i,j,k,l | 51.2i,j,k,l | 48.6j,k,l | 46.4k | 43.3 | 45.1 |
| Physical role limitations | 46.2d,e,f | 47.4c,d,e,f | 45.3d,e,f | 43.2e | 39.7 | 41.4 | 50.1i,j,k,l | 50.1i,j,k,l | 48.6j,k,l | 47.0k | 44.3 | 45.8 |
| Emotional role limitations | 46.6d,e,f | 47.8a,c,d,e,f | 46.4d,e,f | 44.3e | 40.5 | 42.4 | 47.5j,k,l | 48.5g,i,j,k,l | 47.4j,k,l | 45.3k | 42.7 | 44.2 |
| PAM® |  |  |  |  |  |  |  |  |  |  |  |  |
| Mean score | 63.6d,e,f | 64.2d,e,f | 63.7d,e,f | 61.9e | 60.5 | 61.2 | 63.7i,j,k,l | 63.6i,j,k,l | 62.6j,k,l | 61.7k | 60.4 | 61.1 |
| PAM level 1, % | 3.5 | 2.3 | 4.0b | 5.0b | 5.1b | 5.1b | 4.9 | 4.5 | 4.9 | 6.6g,h,i | 8.3g,h,i,j | 7.3g,h,i |
| PAM level 2, % | 16.7 | 15.8 | 18.8 | 25.8a,b,c | 29.0a,b,c | 27.3a,b,c | 15.5 | 16.1 | 17.9g,h | 19.9g,h,i | 23.5g,h,i,j | 21.4g,h,i |
| PAM level 3, % | 56.7 | 58.7d,e,f | 55.1 | 50.6 | 53.1 | 51.9 | 56.9k,l | 57.7k,l | 58.1k,l | 56.4k | 53.5 | 55.2 |
| PAM level 4, % | 23.1e,f | 23.3d,e,f | 22.2e,f | 18.7e | 12.8 | 15.8 | 22.8i,j,k,l | 21.9i,j,k,l | 19.1j,k,l | 17.2k | 14.6 | 16.1 |
| WPAI, % |  |  |  |  |  |  |  |  |  |  |  |  |
| Mean absenteeism | 9.1 | 6.7 | 5.9 | 5.3 | 7.1 | 6.2 | 5.2h | 4.4 | 5.0 | 5.4h | 7.1g,h,i,j | 6.1g,h,i |
| Mean presenteeism | 25.6 | 22.6 | 20.2 | 20.2 | 22.7 | 21.4 | 16.8h | 15.9 | 17.1h | 18.2h | 22.3g,h,i,j | 19.8g,h,i |
| Mean work productivity loss | 27.4 | 24.3 | 22.4 | 21.6 | 25.2 | 23.3 | 18.5h | 17.3 | 18.7h | 19.7h | 24.2g,h,i,j | 21.5g,h,i |
| Activity impairment | 31.2b | 27.7 | 33.8b | 39.2a,b,c | 47.1a,b,c,d | 43.2a,b,c | 20.4 | 21.1g | 25.4g,h | 29.8g,h,i | 37.3g,h,i,j | 33.0g,h,i |
| Currently taking steps to lose weight, % | 21.2 | 46.6a | 62.9a,b | 66.2a,b | 68.8a,b,c | 67.5a,b,c | 26.9 | 49.8g | 63.1g,h | 66.5g,h,i | 69.0g,h,i,j | 67.6g,h,i |
| Primary reason for losing weight, %* |  |  |  |  |  |  |  |  |  |  |  |  |
| To improve general health | 66.1 | 76.3a | 80.6a | 78.0a | 81.8a,b | 79.9a | 43.4 | 58.6g | 66.3g,h | 69.6g,h,i | 74.3g,h,i,j | 71.6g,h,i |
| To improve appearance | 17.8b,c,d,d,e,f | 8.9c,e,f | 3.8 | 6.0 | 4.2 | 5.1 | 47.1h,i,j,k,l | 30.6i,j,k,l | 21.6j,k,l | 17.6k | 12.3 | 15.3 |
| To prevent the development of heart disease or stroke | 12.1 | 12.8 | 13.6 | 14.5 | 10.8 | 12.6 | 5.7 | 8.1g | 10.2g,h | 10.0g,h | 10.5g,h | 10.2g,h |
| Other | 4.0 | 2.0 | 2.0 | 1.6 | 3.2 | 2.4 | 3.8h,i,j,l | 2.7i | 1.9 | 2.8i | 2.9i | 2.8i |
| Mean days vigorously exercised in the past month | 7.5c,d,e,f | 7.0c,d,e,f | 5.7d,e,f | 4.9e | 3.6 | 4.2 | 9.6h,i,j,k,l | 8.5i,j,k,l | 6.9j,k,l | 5.8k | 4.5 | 5.2 |
| Method of weight loss, %* |  |  |  |  |  |  |  |  |  |  |  |  |
| Consulting a specialist | 10.3b,c | 3.1 | 3.6 | 8.0b,c | 9.5b,c | 8.7b,c | 2.4 | 2.4 | 4.0g,h | 5.1g,h,i | 9.2g,h,i,j | 6.9g,h,i |
| Using diet | 84.1 | 84.6 | 84.8 | 86.2 | 86.6 | 86.4 | 70.3 | 74.0g | 75.0g | 76.6g,h | 78.0g,h,i | 77.2g,h,i |
| Using exercise | 74.5c,d,e,f | 68.8c,d,e,f | 61.8e,f | 59.5e | 50.1 | 54.7 | 80.1h,i,j,k,l | 76.9i,j,k,l | 71.6j,k,l | 67.5k | 62.4 | 65.3 |
| Joining a weight management program | 5.0b | 1.6 | 3.2 | 3.1 | 4.7b | 3.9b | 3.6 | 3.9 | 4.1 | 4.9g,h | 6.6g,h,i,j | 5.6g,h,i |
| Using any diet supplements or food | 5.9 | 4.4 | 7.1b | 7.8b | 8.3b | 8.0b | 6.0 | 6.4 | 8.0g,h | 9.2g,h | 10.9g,h,i | 9.9g,h,i |
| Using a nonprescription medication | 4.0 | 2.9 | 3.7 | 3.6 | 3.6 | 3.6 | 3.6 | 3.3 | 3.9 | 5.7g,h,i | 6.2g,h,i | 5.9g,h,i |
| Using a prescription drug | 3.6b | 0.9 | 2.5b | 3.1b | 3.0b | 3.0b | 0.8 | 1.0 | 1.7g,h | 2.4g,h | 3.7g,h,i,j | 3.0g,h,i |
| Other | 4.6 | 6.4 | 5.6 | 5.9 | 7.5 | 6.7 | 2.8 | 4.1g | 5.1g,h | 6.1g,h | 6.5g,h,i | 6.3g,h,i |
| Spoken to a doctor about steps to lose weight* | 41.8 | 52.9a | 62.8a,b | 66.6a,b | 72.4a,b,c,d | 69.6a,b,c | 20.6 | 34.0g | 46.2g,h | 53.5g,h,i | 59.2g,h,i,j | 55.9g,h,i |
| Weight change in the past 6 months, %* |  |  |  |  |  |  |  |  |  |  |  |  |
| Gained | 10.4 | 8.1 | 9.4 | 11.5 | 15.0b,c | 13.3b,c | 11.8h | 10.5 | 12.2h | 13.4h | 16.0g,h,i,j | 14.5g,h,i |
| Lost | 59.3 | 61.5 | 59.3 | 61.9 | 59.7 | 60.8 | 53.3 | 56.4g,k,l | 54.7k | 55.4k | 51.2 | 53.6 |
| Remained the same | 30.4 | 30.4 | 31.3e,f | 26.6 | 25.2 | 25.9 | 34.9j,l | 33.2 | 33.1 | 31.2 | 32.9 | 31.9 |
| Amount of weight lost, pounds* | 15.5 | 17.0 | 17.2 | 18.6 | 22.0a,b,c,d | 20.3a,b,c | 15.7 | 14.7 | 16.5h | 19.4g,h,i | 21.6g,h,i,j | 20.3g,h,i |

**Notes:** *Among people currently taking steps to lose weight. a*P*<0.05 compared with normal weight (T2DM). b*P*<0.05 compared with overweight (T2DM). c*P*<0.05 compared with class 1 obesity (T2DM). d*P*<0.05 compared with class 2 obesity (T2DM). e*P*<0.05 compared with class 3 obesity (T2DM). f*P*<0.05 compared with combined class 2/3 obesity (T2DM). g*P*<0.05 compared with normal weight (non-T2DM). h*P*<0.05 compared with overweight (non-T2DM). i*P*<0.05 compared with class 1 obesity (non-T2DM). j*P*<0.05 compared with class 2 obesity (non-T2DM). k*P*<0.05 compared with class 3 obesity (non-T2DM). l*P*<0.05 compared with combined class 2/3 obesity (non-T2DM).

**Abbreviations:** BMI, body mass index; CCI, Charlson Comorbidity Index; HRQoL, health-related quality of life; MCS, mental component score; PAM®, Patient Activation Measure®; PCS, physical component score; SF-36v2, 36-Item Short Form Health Survey; T2DM, type 2 diabetes mellitus; WPAI, Work Productivity and Activity Impairment.

**Supplemental Table 2. Weight loss behaviors by body weight category**

|  | Normal weight  (BMI ≥18.5–<25 kg/m2) | Overweight (BMI ≥25–<30 kg/m2) | Class 1 obesity  (BMI ≥30–<35 kg/m2) | Class 2 obesity  (BMI ≥35–<40 kg/m2) | Class 3 obesity (BMI ≥40 kg/m2) | Combined class 2 and 3 obesity (BMI ≥35 kg/m2) |
| --- | --- | --- | --- | --- | --- | --- |
| Total population, n | 24,841 | 22,442 | 12,101 | 5,768 | 4,590 | 10,358 |
| Total weighted population (represented in thousands) | 78,479 | 74,006 | 41,293 | 20,258 | 15,850 | 36,108 |
| Currently taking steps to lose weight, % | 26.9 | 49.6a | 63.1a,b | 66.6a,b,c | 69.2a,b,c,d | 67.7a,b,c |
| Primary reason for losing weight, %* |  |  |  |  |  |  |
| To improve general health | 44.0 | 60.2a | 68.5a,b | 71.6a,b,c | 76.0a,b,c,d | 73.6a,b,c |
| To improve appearance | 46.1b,c,d,e,f | 28.7c,d,e,f | 18.8d,e,f | 15.2e | 10.6 | 13.1 |
| To prevent the development of heart disease or stroke | 6.0 | 8.5a | 10.8a,b | 10.7a,b | 10.6a,b | 10.6a,b |
| Other | 3.8b,c,d,e,f | 2.6c | 1.9 | 2.5 | 2.9c | 2.7c |
| Mean days vigorously exercised in the past month | 9.5b,c,d,e,f | 8.4c,d,e,f | 6.7d,e,f | 5.6e | 4.3 | 5.0 |
| Method of weight loss, %* |  |  |  |  |  |  |
| Consulting a specialist | 2.8 | 2.5 | 4.0a,b | 5.6a,b,c | 9.3a,b,c,d | 7.2a,b,c |
| Using diet | 70.8 | 75.0a | 76.7a,b | 78.6a,b | 80.4a,b,c | 79.4a,b,c |
| Using exercise | 79.9b,c,d,e,f | 76.1c,d,e,f | 70.3d,e,f | 66.0e | 59.3 | 63.0 |
| Joining a weight management program | 3.8 | 3.7 | 4.1 | 4.5 | 6.1a,b,c,d | 5.2a,b,c |
| Using any diet supplements or food | 6.2 | 6.3 | 7.9a,b | 8.8a,b | 10.3a,b,c | 9.5a,b,c |
| Using a nonprescription medication | 3.7 | 3.4 | 4.0 | 5.3a,b,c | 5.5 a,b,c | 5.4 a,b,c |
| Using a prescription drug | 1.0 | 1.0 | 1.8a,b | 2.5a,b,c | 3.6a,b,c,d | 3.0a,b,c |
| Other | 2.7 | 4.3a | 5.0a,b | 5.9a,b | 6.6a,b,c | 6.2a,b,c |
| Spoken to a doctor about steps to lose weight* | 21.4 | 35.8a | 49.0a,b | 56.3a,b,c | 62.6a,b,c,d | 59.2a,b,c |
| Weight change in the past 6 months, %* |  |  |  |  |  |  |
| Gained | 12.0b | 10.4 | 11.8b | 13.1b | 15.7a,b,c,d | 14.2a,b,c |
| Lost | 53.4 | 56.8a,e,f | 55.3a | 56.3a,e | 53.2 | 54.9 |
| Remained the same | 34.7b,d,e,f | 32.9d,f | 32.9d,f | 30.7 | 31.1 | 30.8 |
| Amount of weight lost, pounds* | 15.8 | 15.0 | 16.6b | 19.2a,b,c | 21.8a,b,c,d | 20.3a,b,c |

**Notes:** *Among people currently taking steps to lose weight. a*P*<0.05 compared with normal weight. b*P*<0.05 compared with overweight. c*P*<0.05 compared with class 1 obesity. d*P*<0.05 compared with class 2 obesity. e*P*<0.05 compared with class 3 obesity. f*P*<0.05 compared with combined class 2/3 obesity.

**Abbreviations:** BMI, body mass index.
